# Supplementary material for: Enterobacter aerogenes ZDY01 inhibits choline-induced atherosclerosis through CDCA-FXR-FGF15 axis
Source: Royal Society of Chemistry journal article supplement (doi:10.1039/d1fo02021h), 2021-01-01
Supplement: d1fo02021h1.pdf [file d1fo02021h1.pdf]

Figure. S1 *E. aerogenes* ZDY01 modulated the composition of the gut microbiota in mice at the genus level. (A), (B), and (C) LEfSe analysis showing significant differences in abundance among four groups at the order, family and genus level, respectively. The length of the histogram represents the degree of influence of the different species (i.e., LDA score). (D) Relative abundance of top 10 genera in all four groups.
